# Supplementary material for: Genomic and functional analysis of the host response to acute simian varicella infection in the lung
Source: PubMed Central journal article supplement (PMC5039758; doi:10.1038/srep34164), 2016-09-28
Supplement: srep34164-s1.pdf [file srep34164-s1.pdf]

**Genomic and functional analysis of the host response to acute simian varicella infection in the lung**

Nicole Arnold<sup>1</sup>, Thomas Girke<sup>2</sup>, Suhas Sureshchandra<sup>3</sup>, Christina Nguyen<sup>4</sup>, Maham Rais<sup>4</sup> and Ilhem Messaoudi<sup>1,3,4\*</sup>

<sup>1</sup>Graduate Program in Microbiology, University of California-Riverside, CA, USA

<sup>2</sup> Department of Botany and Plant Sciences, University of California-Riverside, CA, USA

<sup>3</sup>Graduate Program in Genetics, Genomics and Bioinformatics, University of California-Riverside, CA, USA

<sup>4</sup>Division of Biomedical Sciences, School of Medicine, University of California-Riverside, Riverside, CA

\*To whom correspondence should be addressed

Ilhem Messaoudi, PhD

University of California Riverside

900 University Avenue

Riverside, CA 92521

Tel.: 951-827-7774

E-mail: [ilhem.messaoudi@ucr.edu](mailto:ilhem.messaoudi@ucr.edu)

a.

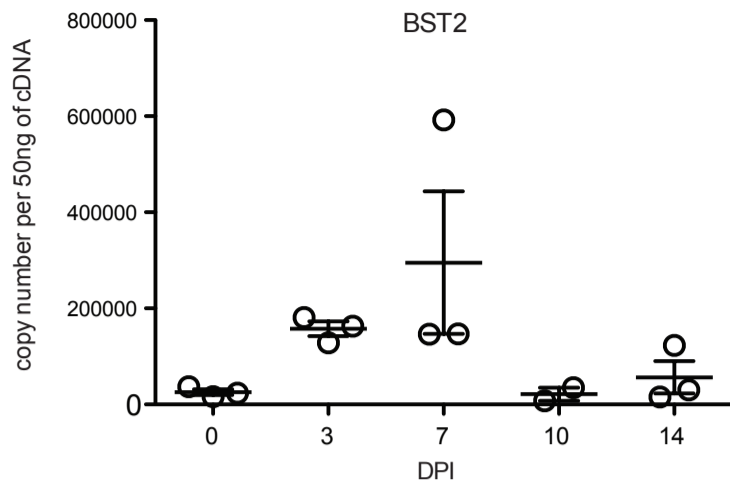

b.

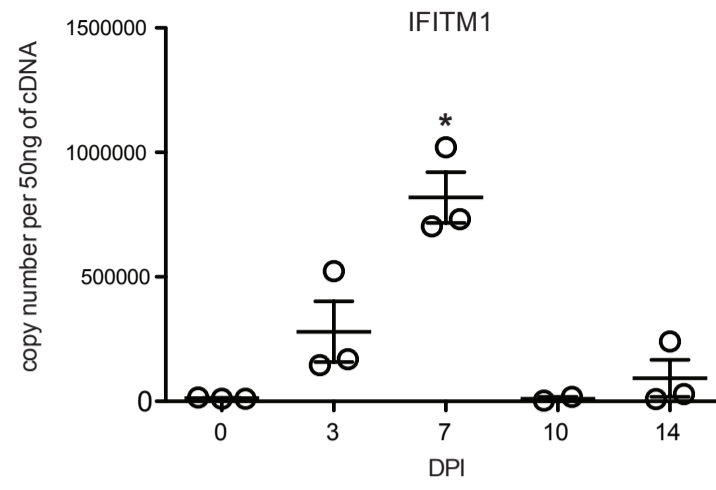

c.

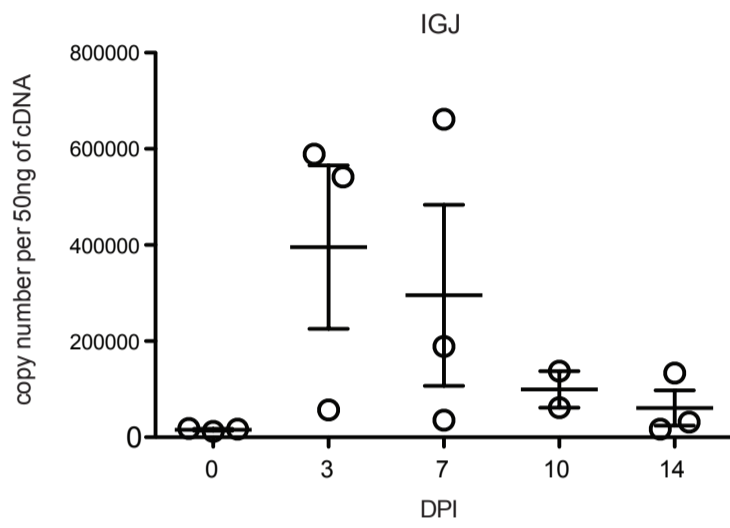

d.

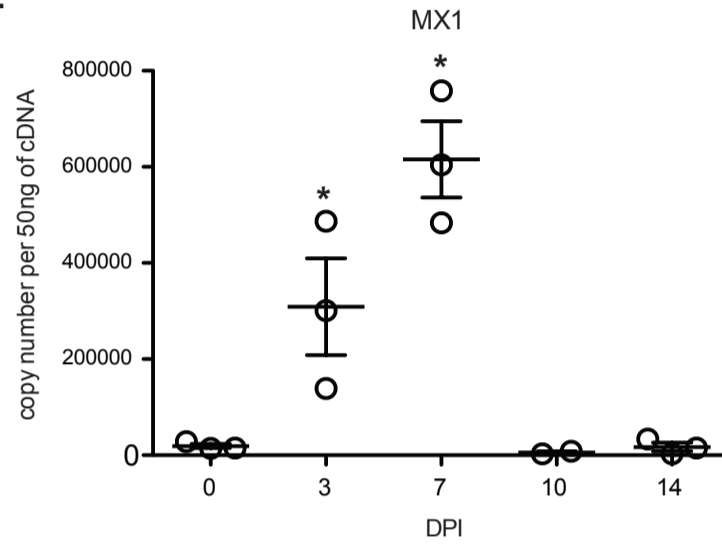

**Supplemental Figure 1: Gene Validation.** Taqman expression assays were done on (A) BST2 (B) IFITM1 (C) IGJ and (D) MX1. Statistical significance was determined using one-way ANOVA. Error bars show the standard error of the mean (\*,  $p < 0.05$  compared to 0 DPI).

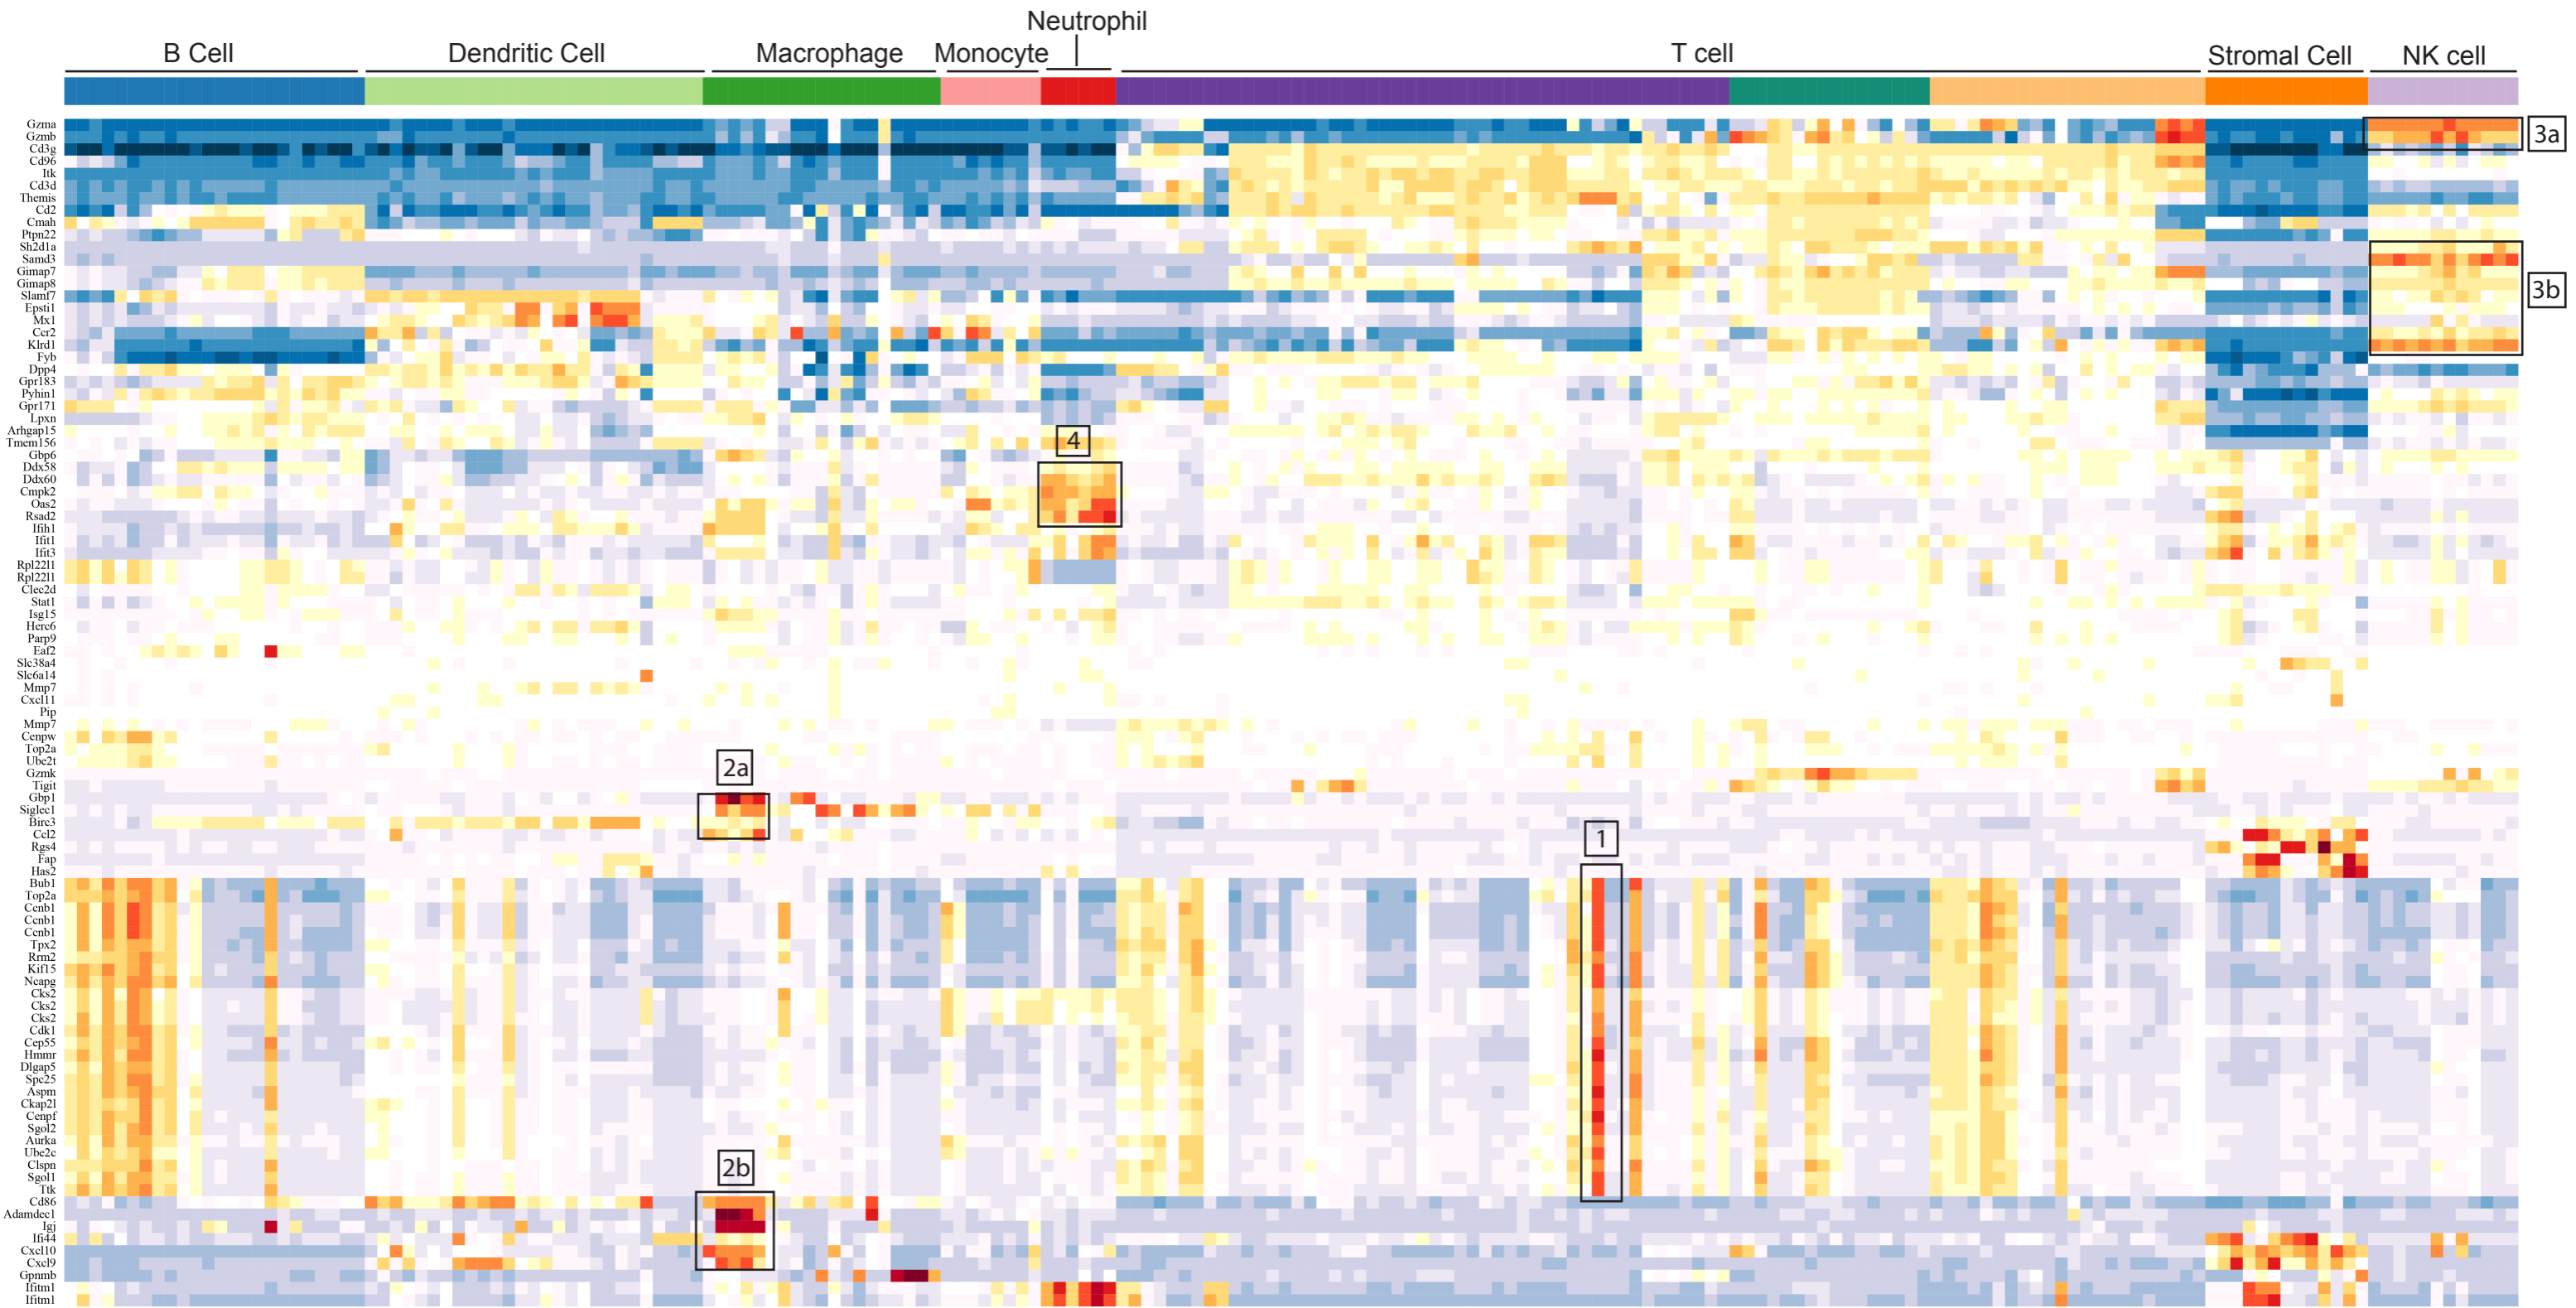

**Supplemental Figure 2:** ImmGen heatmap showing the expression profile of the genes up-regulated 3 days post infection (DPI) across different immune cell populations. Each row represents a gene and a corresponding microarray ID and columns represents an immune cell type and study. Colors represents expression levels where red indicates the likelihood that the gene of interest is highly expressed by a specific cell type and blue represents low expression. Cluster 1 shows genes involved in the cell cycle (e.g. *Top2a*, *BUB1*, *CEP55*) mapping to B cells, dendritic cells and T cells. Cluster 2a,b shows genes that are highly expressed in macrophages (*ADAMDEC1*, *IgJ*, *IFI44*, *CXCL9* and *CXCL10*). Cluster 3a,b shows genes *SAMD3*, *GZMB* and *GZMA* highly expressed by NK cells. Cluster 4 shows antiviral genes *DDX60*, *OAS2* and *RSAD2* highly expressed by neutrophils.

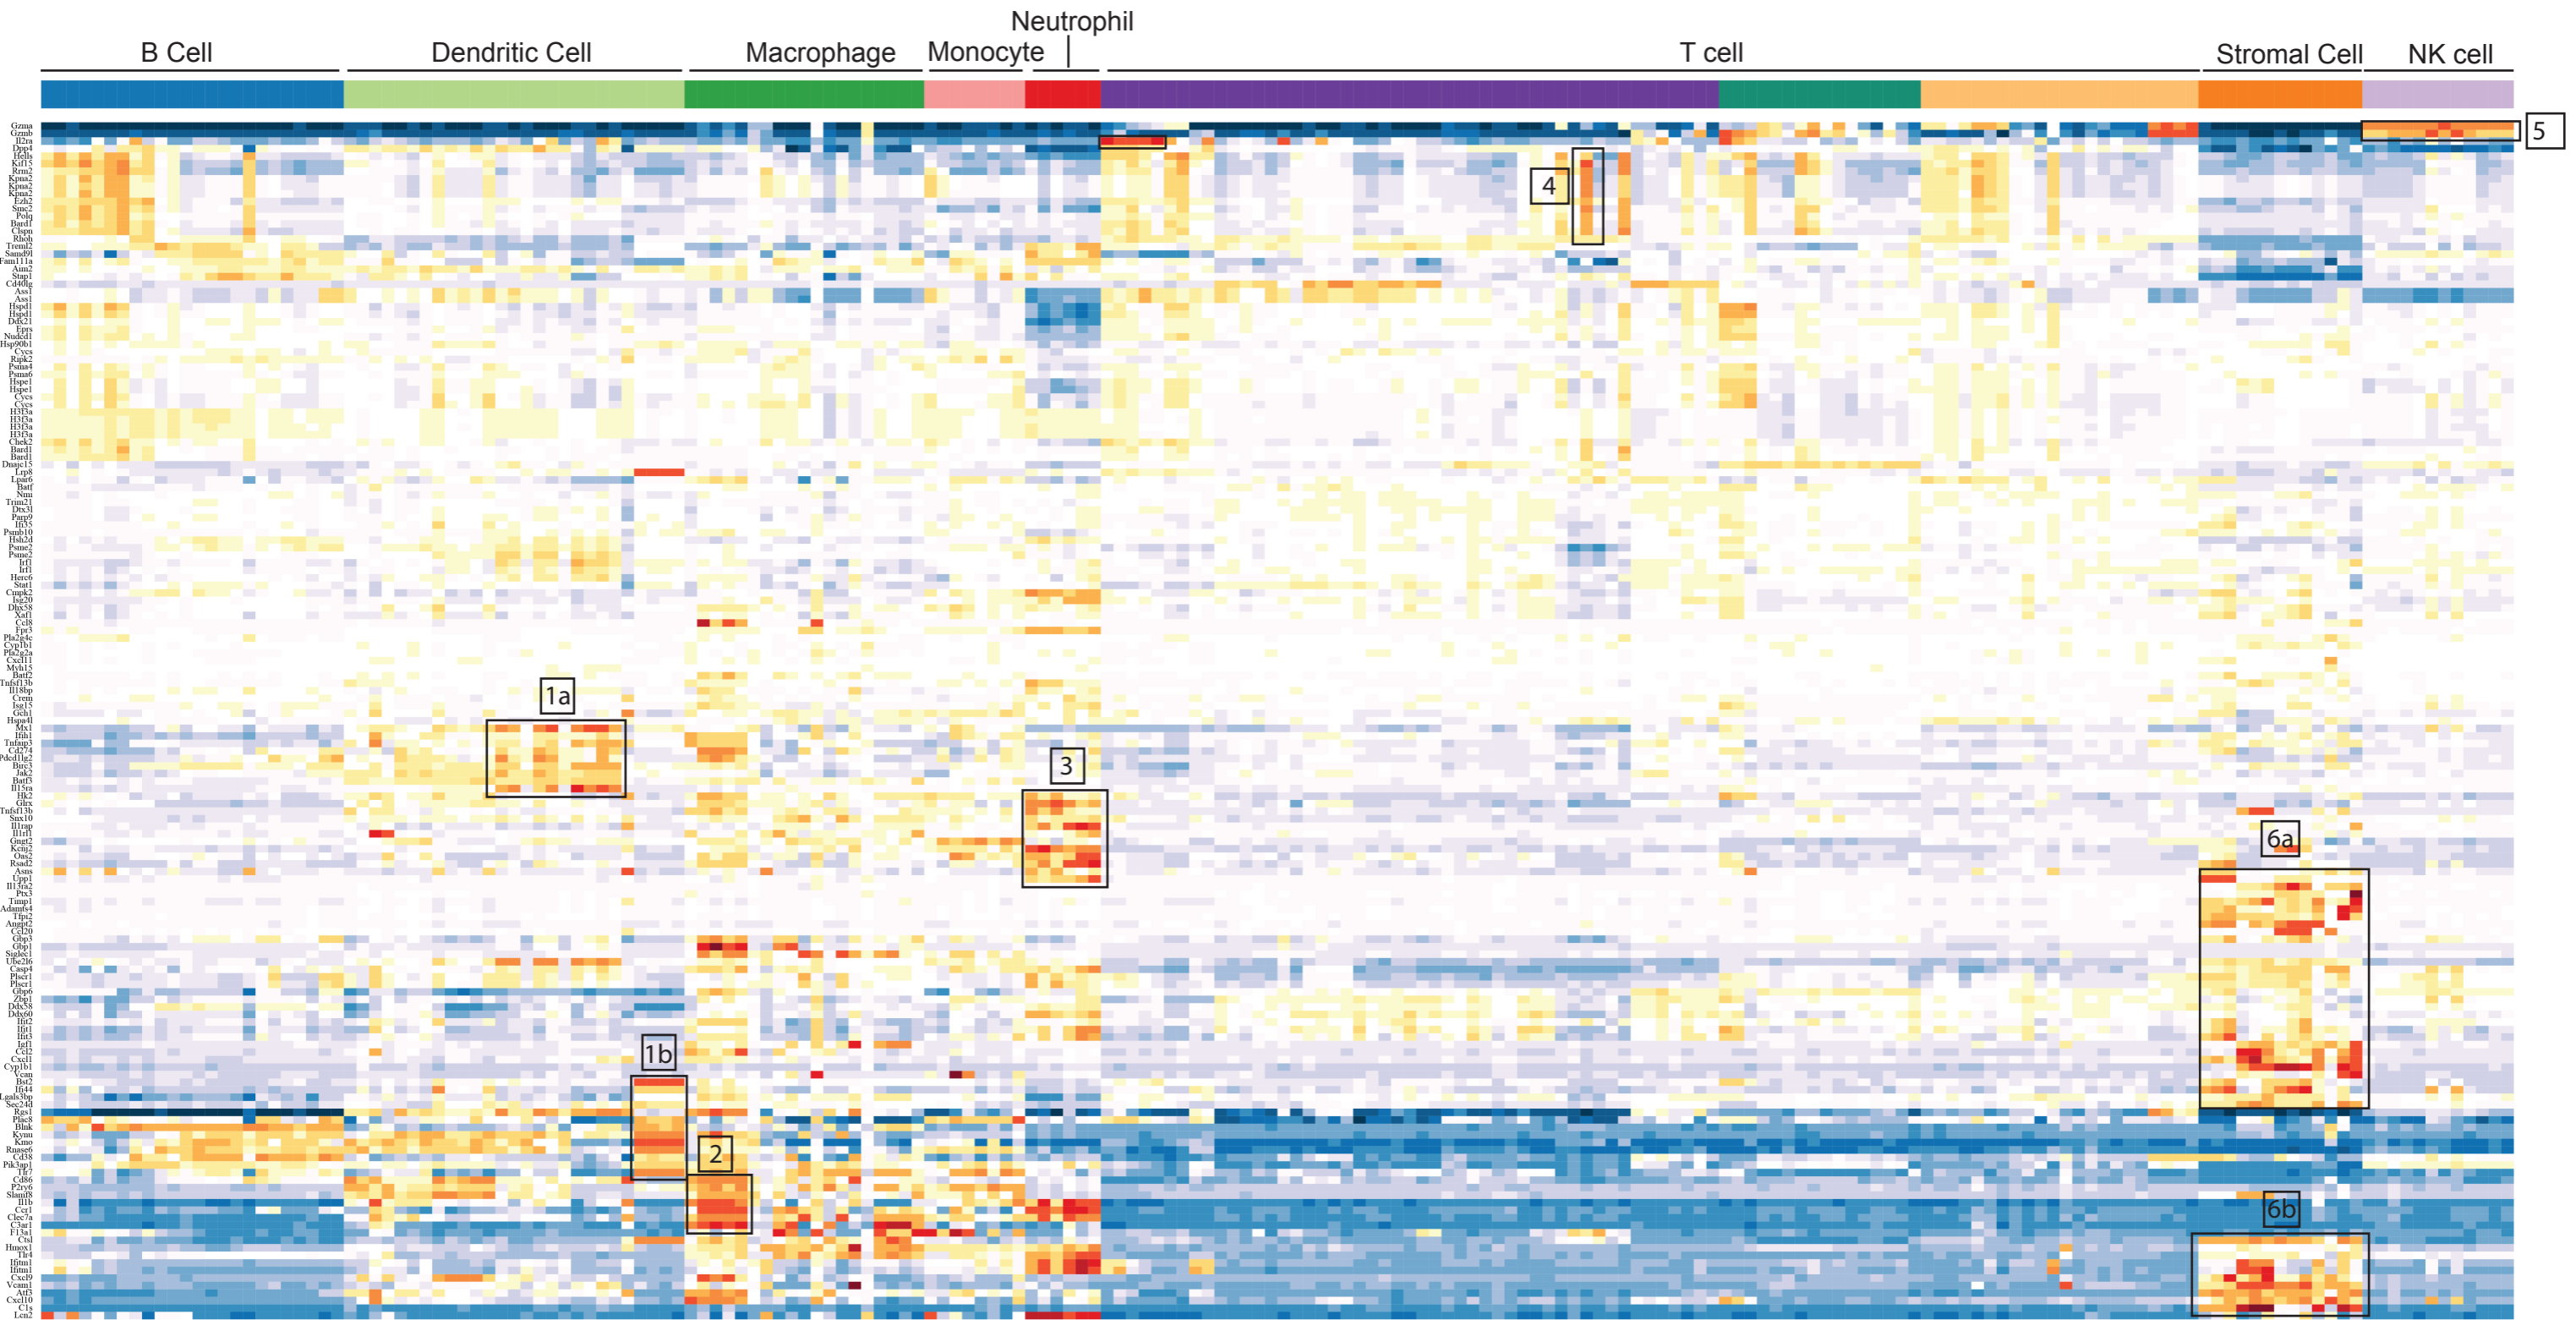

**Supplemental Figure 3:** ImmGen heatmap showing the expression profile of the immune genes up-regulated 7 DPI across different immune cell populations. Each row represents a gene and a corresponding microarray ID and columns represents an immune cell type and study. Colors represents expression levels where red indicates the likelihood that the gene of interest is highly expressed by a specific cell type and blue represents low expression. Gene clusters 1a,b show antiviral genes (*MX1* and *IFIH1*), immune homeostasis genes (*CD274* and *PDCD1LG2*) and genes involved in apoptosis (*TNFAIP3* and *BIRC3*) highly expressed by DCs. Cluster 2 highlights a cluster of genes highly expressed in the macrophages that are involved in the proinflammatory response such as *CD86*, *IL-1 $\beta$*  and *CCR1*. Cluster 3 shows antiviral genes (*OAS2* and *RSAD2*) and proinflammatory genes (*TNFSF13B* and *IL1RAP*) primarily expressed in neutrophils. Cluster 4 shows highly expressed genes shared by B and T cells (e.g. *RRM2*, *KPNA1* and *EZH2*). Cluster 5 shows genes *GZMA* and *GZMB* are highly expressed by NK and T cells. Clusters 6a,b shows genes highly expressed by stromal cells, many of which are also involved in proinflammation (e.g. *CCL1*, *CXCL1*, *CXCL9*, *CXCL10* and *IFITM1*).

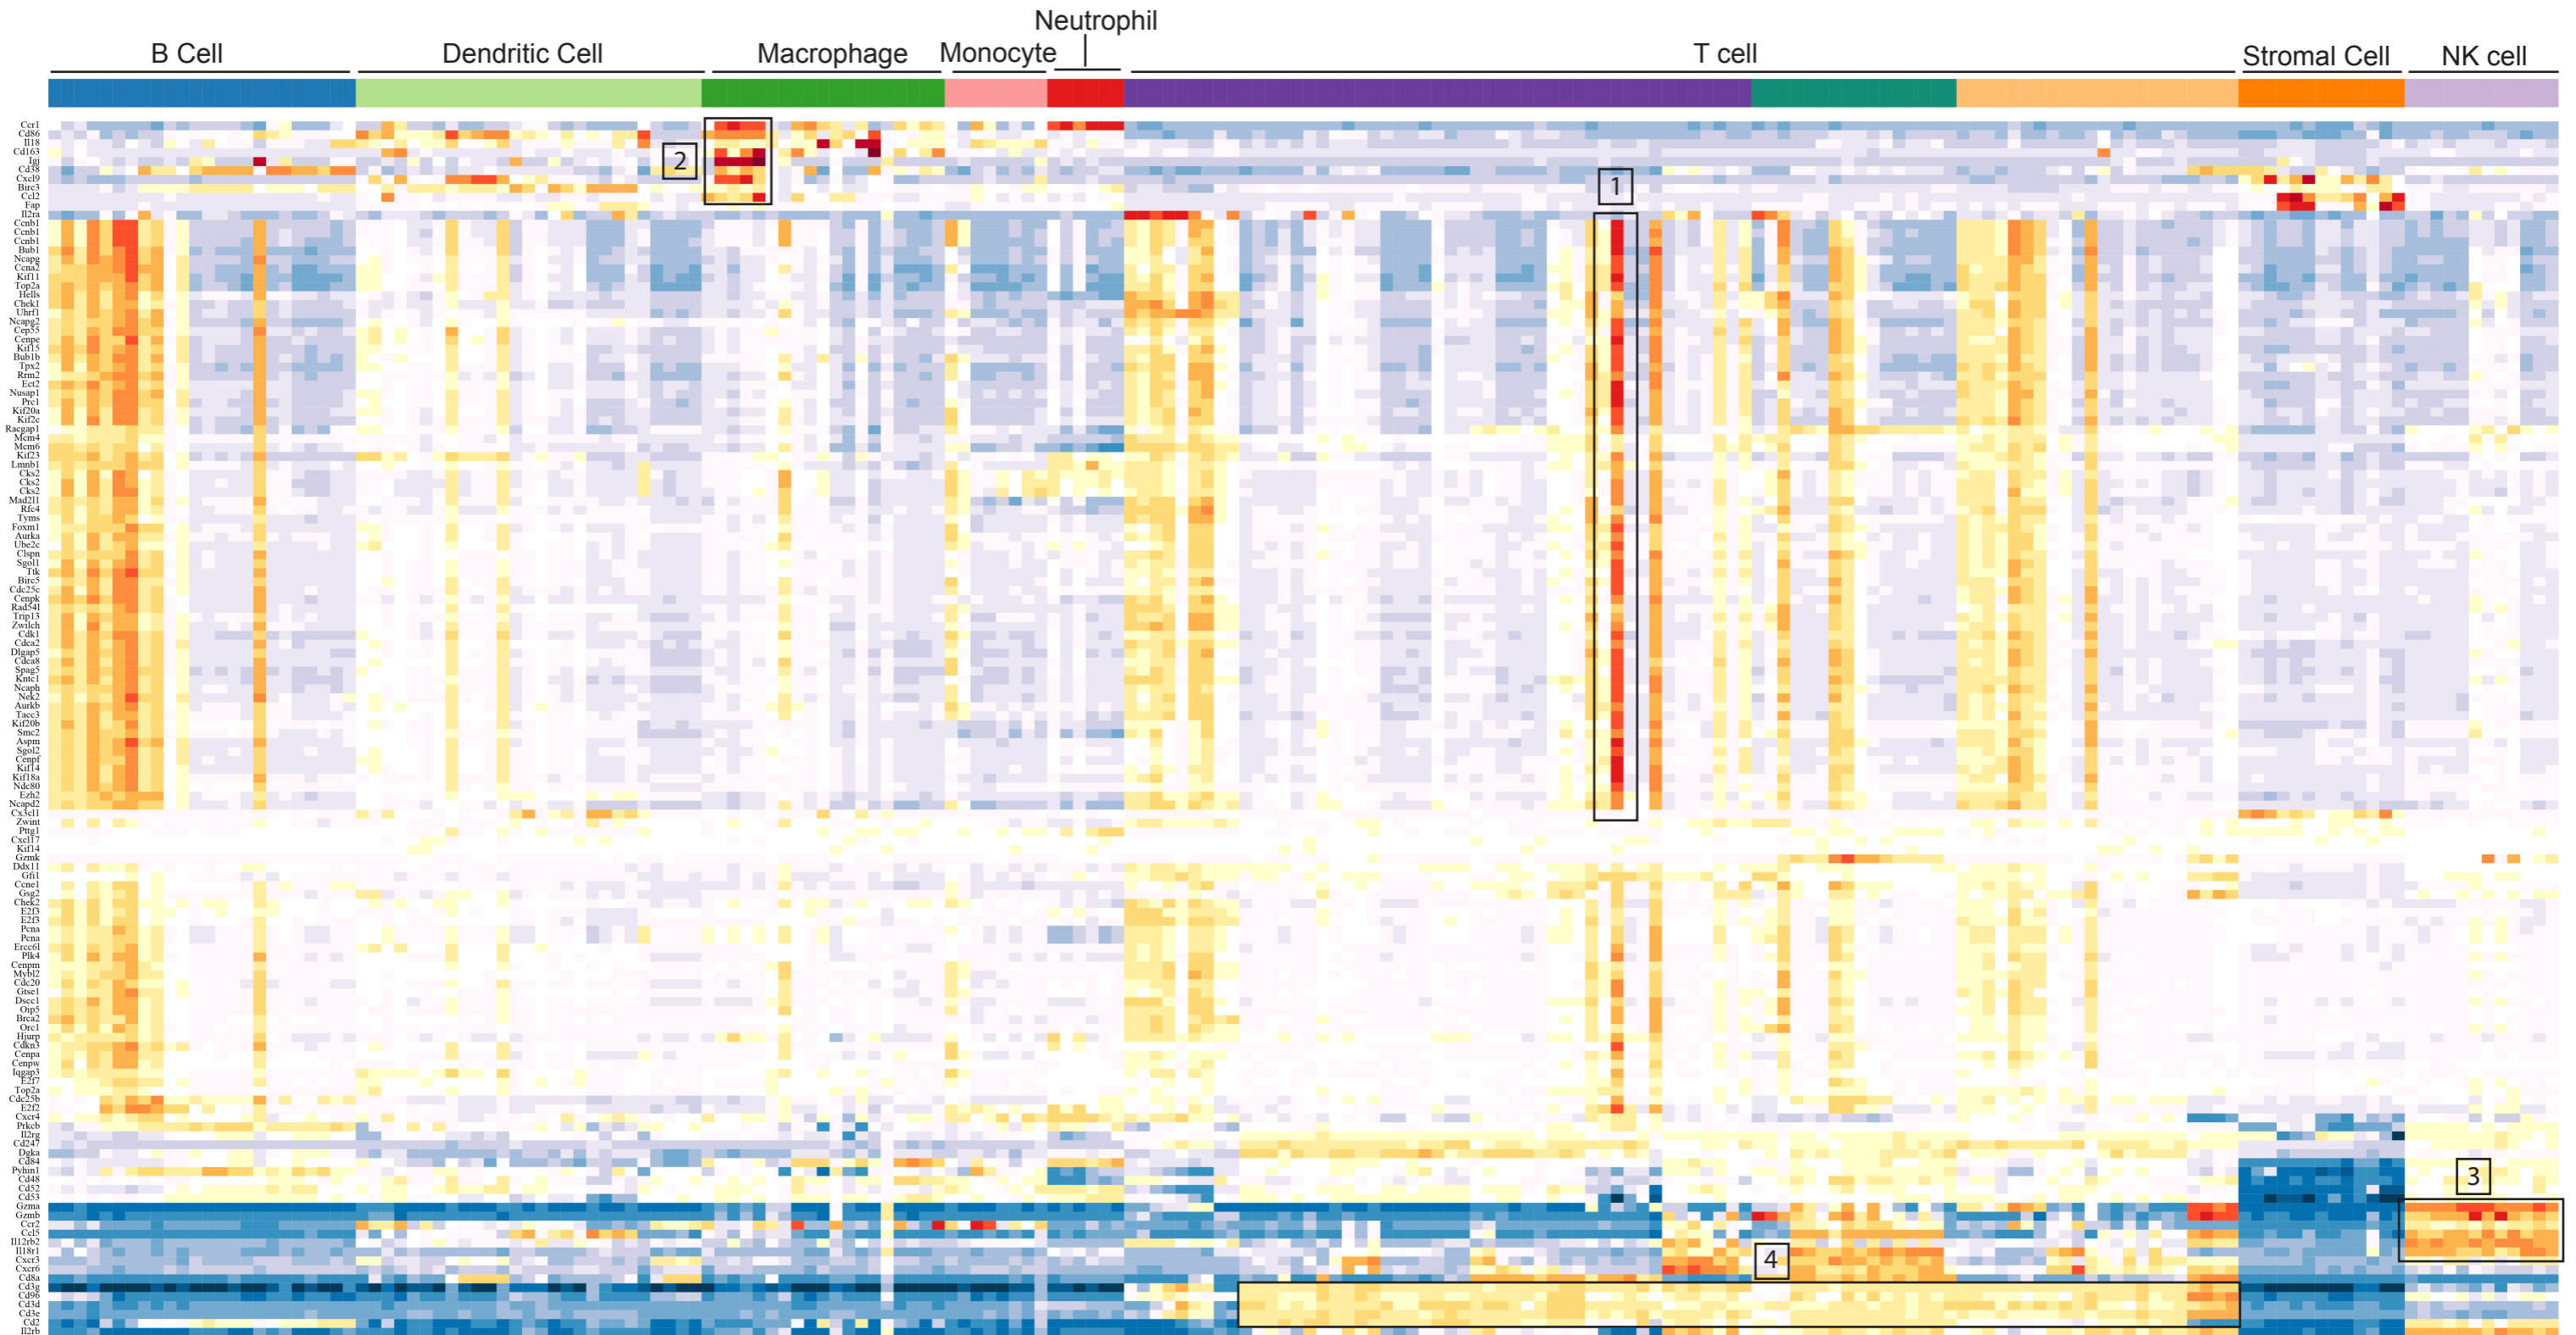

**Supplemental Figure 4:** ImmGen heatmap showing the expression profile of the genes up-regulated 10 DPI across different immune cell populations. Each row represents a gene and a corresponding microarray ID and columns represents an immune cell type and study. Colors represent expression levels where red indicates the likelihood that the gene of interest is highly expressed by a specific cell type and blue represents low expression. Cluster 1 shows a large number of genes involved with the cell cycle (e.g. *CCNB1*, *KIF11*, *TOP2A*, *SPAG5* and *CENPF*) that are highly expressed by T cells and B cells. Cluster 2 shows genes highly expressed by macrophages (*CD163*, *IL-18*, *CCR1* and *CXCL9*). Cluster 3 shows genes that are highly expressed by NK cells and T cells (*GZMA*, *GZMB*, *CCR2* and *CCL5*). Cluster 4 shows genes highly expressed by T cells (*CD96*, *CD3D*, and *CD2*).
